# Supplementary material for: Thermal reaction of a (hydrido)(selenolato)platinum(ii) complex having a dibenzobarrelenyl group leading to three cyclometalations
Source: Royal Society of Chemistry journal article supplement (doi:10.1039/c0dt00483a), 2010-01-01
Supplement: c0dt00483a.pdf [file c0dt00483a.pdf]

**Thermal reaction of a (hydrido)(selenolato)platinum(II) complex having a dibenzobarrelenyl group leading to three cyclometalations**

**Akihiko Ishii,\*<sup>a</sup> Yuki Yamaguchi<sup>a</sup> and Norio Nakata<sup>a</sup>**

<sup>a</sup> *Department of Chemistry, Graduate School of Science and Engineering, Saitama University, Shimo-okubo 255, Sakura-ku, Saitama 338-8570, Japan. E-mail: ishiaki@chem.saitama-u.ac.jp; Fax: +81-48-858-3394*

**Experimental**

**General:** The melting points were determined on a Mel-Temp capillary tube apparatus and are uncorrected. <sup>1</sup>H, <sup>13</sup>C{<sup>1</sup>H}, <sup>31</sup>P{<sup>1</sup>H}, and <sup>77</sup>Se{<sup>1</sup>H} NMR spectra were determined on Bruker AM400 or DRX400 (400, 100.7, 162, and 76.3 MHz, respectively) spectrometers using CDCl<sub>3</sub> as the solvent at 25 °C, unless otherwise noted. IR spectra were taken on a Perkin Elmer System 2000 FT-IR spectrometer. Mass spectra were determined on a JEOL JMS-700AM spectrometer operating at 70 eV in the EI mode. Elemental analyses were performed at Molecular Analysis and Life Science Center of Saitama University. Column chromatography was performed with silica gel (70-230 mesh) and the eluent is shown in parentheses.

**Preparation of 9-Dibenzobarreleneselenol (DbbSeH, 5)**

*t*-BuLi (1.58 M, 12.5 mL, 19.75 mmol) was added to a solution of 9-bromodibenzobarrelene (**4**) (2.7981g, 9.88 mmol) in THF (50 mL) at -78 °C under argon. After stirring for 30 min at -78 °C, elemental selenium (1.9355 g, 24.5 mmol) was added. The mixture was warmed to room temperature, heated under reflux for 21 h, and subjected to oxidation by exposure to air for 1 h. The precipitates were removed through a pad of Celite<sup>®</sup> and the filtrate was shaken with dichloromethane and water. The organic layer was separated, dried over anhydrous Na<sub>2</sub>SO<sub>4</sub>, and evaporated to dryness. The residue was subjected to column chromatography (hexane-dichloromethane 3/1) to give (Dbb)<sub>2</sub>Se<sub>*n*</sub> (2.4547 g) as an orange solid, which was treated with

NaBH<sub>4</sub> (729.2 mg, 19.3 mmol) in THF (70mL) at room temperature. The reaction was quenched by addition of dilute hydrochloric acid and the mixture was extracted with dichloromethane. The organic layer was washed with water and dried over anhydrous Na<sub>2</sub>SO<sub>4</sub>, and the solvent was evaporated to dryness to give selenol DbbSeH (**5**) (2.19 g, 78% from DbbBr).

**5**: Colorless crystals, mp 139–140 °C (from CH<sub>2</sub>Cl<sub>2</sub>) (Found: C, 67.66; H, 4.26. Calc. for C<sub>16</sub>H<sub>12</sub>Se: C, 67.85; H, 4.27%);  $\nu_{\max}$ (KBr)/cm<sup>-1</sup> 2299 (SeH);  $\delta_{\text{H}}$ (400 MHz; CDCl<sub>3</sub>; Me<sub>4</sub>Si) 0.51 (1 H, s,  $J_{\text{Se-H}}$  53), 5.09 (1 H, d,  $J$  6.0), 6.84 (1 H, d,  $J$  6.8), 6.95–7.02 (5 H, m), 7.25 (2 H, d,  $J$  6.4), and 7.60 (2 H, d,  $J$  6.8);  $\delta_{\text{C}}$ (100.7 MHz; CDCl<sub>3</sub>; Me<sub>4</sub>Si) 51.0, 54.6, 122.6, 122.7, 124.4, 125.0, 140.3, 145.3, 145.5, and 146.8;  $\delta_{\text{Se}}$  (76.3 MHz; CDCl<sub>3</sub> Me<sub>2</sub>Se) 19.4.

#### Reaction of DbbSeH (**5**) with [Pt(nb)(PPh<sub>3</sub>)<sub>2</sub>]

A solution of selenol **5** (113 mg, 0.40 mmol) in toluene (5 mL) was added to a solution of [Pt(nb)(PPh<sub>3</sub>)<sub>2</sub>] (324 mg, 0.40 mmol) in toluene (5 mL) at 0 °C under argon. The mixture was stirred for 2 h at room temperature, and the solvent was removed under reduced pressure. The residue was recrystallized from a mixed solvent of CH<sub>2</sub>Cl<sub>2</sub> and hexane to give [PtH(SeDbb)(PPh<sub>3</sub>)<sub>2</sub>] (**6**) (329 mg, 83%).

#### PtH(SeDbb)(PPh<sub>3</sub>)<sub>2</sub> (**6**)

Coloreless crystals, mp 144–145 °C decomp (from CH<sub>2</sub>Cl<sub>2</sub>-hexane) (Found: C, 60.93; H, 4.17. Calc for C<sub>52</sub>H<sub>42</sub>P<sub>2</sub>PtSe•H<sub>2</sub>O: C, 61.17; H, 4.34%; one equivalent of H<sub>2</sub>O was observed in the <sup>1</sup>H NMR spectrum measured in CDCl<sub>3</sub> dried by passing through a short column of active Al<sub>2</sub>O<sub>3</sub>);  $\nu_{\max}$ (KBr)/cm<sup>-1</sup> 2096 (PtH);  $\delta_{\text{H}}$ (400 MHz; CDCl<sub>3</sub>; Me<sub>4</sub>Si) -5.99 (1 H, dd, <sup>2</sup> $J_{\text{P-H}}$  182 and 16, <sup>1</sup> $J_{\text{Pt-H}}$  874), 4.95 (1 H, d,  $J$  2.8), 6.78–6.88 (2 H, m), 6.93–7.01 (8 H, m), 7.12–7.28 (22 H, m), 7.51–7.56 (6 H, m), and 8.12 (2 H, d,  $J$  6.8);  $\delta_{\text{P}}$ (162 MHz; CDCl<sub>3</sub>; 85% H<sub>3</sub>PO<sub>4</sub>) 20.2 (d, <sup>2</sup> $J_{\text{P-P}}$  15 Hz, <sup>1</sup> $J_{\text{Pt-P}}$  3265) and 29.9 (d, <sup>2</sup> $J_{\text{P-P}}$  15, <sup>1</sup> $J_{\text{Pt-P}}$  2086).

### Thermal reaction of PtH(SeDbb)(PPh<sub>3</sub>)<sub>2</sub> (**6**)

A solution of (hydrido)(selenolato)Pt<sup>II</sup> complex **6** (419 mg, 0.418 mmol) in toluene (20 mL) was refluxed for 4 h, and then the solvent was removed under reduced pressure. The residue was chromatographed (hexane-CH<sub>2</sub>Cl<sub>2</sub> 2/1) to give **7** (191 mg, 45%), **8** (50 mg, 12%), and **9** (20 mg, 5%) in this order.

**2-Platinaselenetane 7:** Colorless crystals, m.p. 304-305 °C decomp (from CH<sub>2</sub>Cl<sub>2</sub>) (Found: C, 62.29; H, 4.12. Calc for C<sub>52</sub>H<sub>42</sub>P<sub>2</sub>PtSe: C, 62.28; H, 4.22%.); δ<sub>H</sub>(400 MHz; CDCl<sub>3</sub>; Me<sub>4</sub>Si) 0.45–0.51 (1 H, m), 1.03–1.23 (1 H, m), 1.39–1.63 (1 H, m, *J*<sub>Pt-H</sub> 90 Hz), 3.79 (1 H, s), 6.79–7.00 (16 H, m), 7.03–7.14 (3 H, m), 7.17–7.33 (11 H, m), 7.44–7.48 (6 H, m), 7.59–7.72 (1 H, m), and 8.13 (1 H, d, *J* 7.2); δ<sub>C</sub> (100.7 MHz; CDCl<sub>3</sub>; Me<sub>4</sub>Si) 17.0 (d, <sup>1</sup>*J*<sub>P-C</sub> 97), 35.0, 45.5, 60.6, 121.0, 121.3, 123.0, 123.3, 124.8, 124.9, 125.0, 127.5 (d, <sup>2</sup>*J*<sub>P-C</sub> 10), 127.8 (d, <sup>2</sup>*J*<sub>P-C</sub> 10), 127.9, 129.6, 129.7, 132.3 (d, <sup>1</sup>*J*<sub>P-C</sub> 6.0), 132.8 (d, <sup>1</sup>*J*<sub>P-C</sub> 14), 134.1 (d, <sup>3</sup>*J*<sub>P-C</sub> 6.0), 134.2 (d, <sup>3</sup>*J*<sub>P-C</sub> 6.0), 139.1, 145.3, 148.9, and 154.2; δ<sub>P</sub>(162 MHz; CDCl<sub>3</sub>; 85% H<sub>3</sub>PO<sub>4</sub>) 18.4 (d, <sup>2</sup>*J*<sub>P-P</sub> 9.7, <sup>1</sup>*J*<sub>Pt-P</sub> 3530) and 26.4 (d, <sup>2</sup>*J*<sub>P-P</sub> 9.7, <sup>1</sup>*J*<sub>Pt-P</sub> 1920).



NOESY spectrum of 7

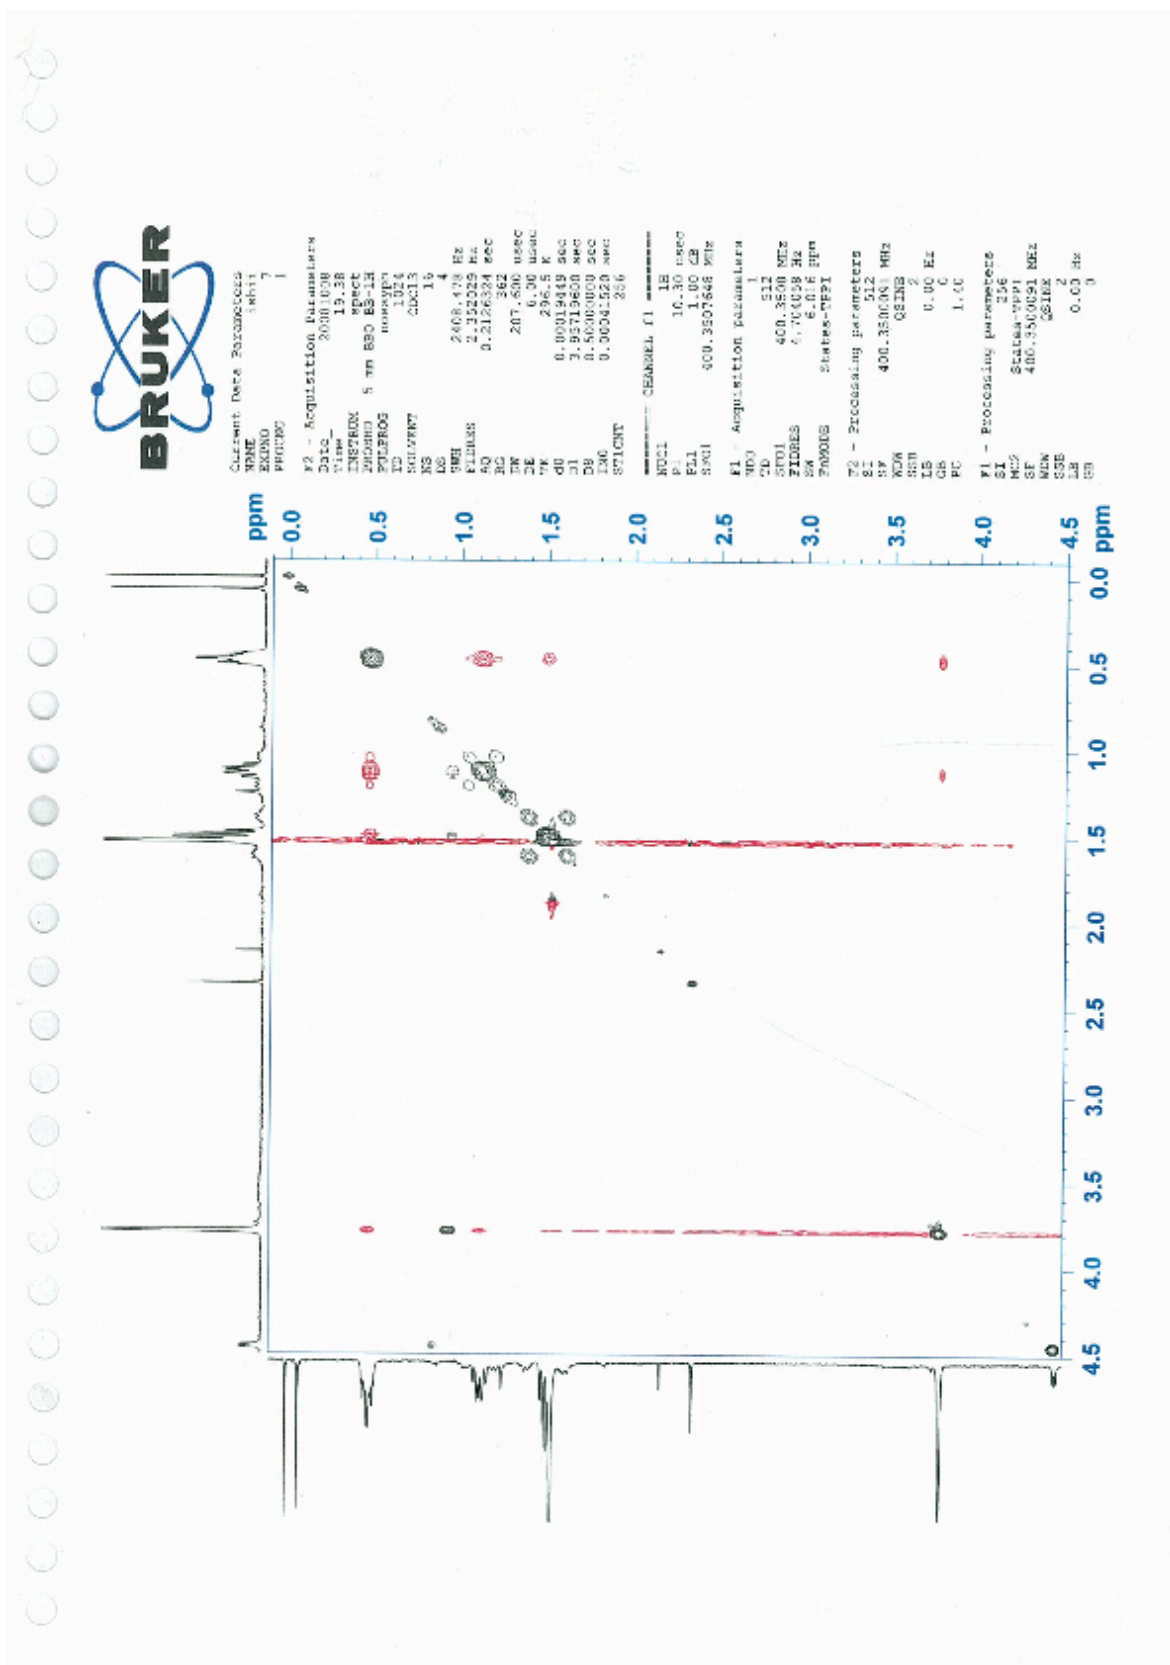

**3-Methylene-2-platinaselentane 8:** Colorless crystals, mp 304–305 °C (from CH<sub>2</sub>Cl<sub>2</sub>) (Found: C, 62.18; H, 3.89. Calc for C<sub>52</sub>H<sub>40</sub>P<sub>2</sub>PtSe: C, 62.40; H, 4.03%);  $\delta_{\text{H}}$ (400 MHz; CDCl<sub>3</sub>; Me<sub>4</sub>Si) 4.46 (1 H, dd, *J* 5.6 and 2.0), 5.26 (1 H, t, *J* 5.0, *J*<sub>Pt-H</sub> 57), 6.80–6.90 (8 H, m), 6.95–6.99 (3 H, m), 7.05–7.30 (17 H, m), 7.42–7.47 (8 H, m), and 7.66 (2 H, d, *J* 7.2 Hz);  $\delta_{\text{C}}$ (100.7 MHz; CDCl<sub>3</sub>; Me<sub>4</sub>Si) 51.2 (d, <sup>4</sup>*J*<sub>P-C</sub> 6.0), 68.8 (dd, <sup>3</sup>*J*<sub>P-C</sub> 11 and 3.0), 120.6, 122.7 (2C), 123.2, 127.3 (d, <sup>2</sup>*J*<sub>P-C</sub> 10), 127.6 (d, <sup>1</sup>*J*<sub>P-C</sub> 10), 129.7, 129.9, 131.7 (d, <sup>1</sup>*J*<sub>P-C</sub> 47), 133.1 (d, <sup>1</sup>*J*<sub>P-C</sub> 37), 134.3 (d, <sup>3</sup>*J*<sub>P-C</sub> 11), 135.0 (d, <sup>3</sup>*J*<sub>P-C</sub> 11), 145.0, and 149.5;  $\delta_{\text{P}}$ (162 MHz; CDCl<sub>3</sub>; 85% H<sub>3</sub>PO<sub>4</sub>) 17.0 (d, <sup>2</sup>*J*<sub>P-P</sub> 13, <sup>1</sup>*J*<sub>Pt-P</sub> 3256) and 25.0 (d, <sup>2</sup>*J*<sub>P-P</sub> 13, <sup>1</sup>*J*<sub>Pt-P</sub> 2044).

**Selenaplinationcyclopentene 9:** Colorless crystals, m.p. 212–213 °C decomp (from hexane-CH<sub>2</sub>Cl<sub>2</sub>) (Found: C, 62.14; H, 4.01. Calc for C<sub>52</sub>H<sub>40</sub>P<sub>2</sub>PtSe: C, 62.40; H, 4.03%);  $\delta_{\text{H}}$ (400 MHz; CDCl<sub>3</sub>; Me<sub>4</sub>Si) 4.88 (1 H, d, *J* 5.6), 5.80–5.86 (1 H, m), 6.58–7.76 (38 H, m), and 7.97 (1 H, d, *J* 6.4);  $\delta_{\text{P}}$ (162 MHz; CDCl<sub>3</sub>; 85% H<sub>3</sub>PO<sub>4</sub>) 21.9 (d, <sup>2</sup>*J*<sub>P-P</sub> 21, <sup>1</sup>*J*<sub>Pt-P</sub> 1831) and 24.2 (d, <sup>2</sup>*J*<sub>P-P</sub> 21, <sup>1</sup>*J*<sub>Pt-P</sub> 3259).

#### **Thermal reaction of [PtH(SeDbb)(PPh<sub>3</sub>)<sub>2</sub>] (6) in the presence of PPh<sub>3</sub>**

A mixture of **6** (34 mg, 0.037 mmol) and PPh<sub>3</sub> (97 mg, 0.371 mmol) in toluene (2 mL) was heated under reflux for 13 h. The solvent was removed under reduced pressure and the residue was subjected to chromatography (hexane-CH<sub>2</sub>Cl<sub>2</sub> 1/2) to give **8** (24 mg, 67%) and **9** (5 mg, 13%) in this order.
